# Supplementary material for: Ability of AZD1222 vaccination to elicit neutralising antibodies against SARS-CoV-2 VOC B.1.617.2 (Delta)
Source: PubMed Central journal article supplement (PMC8238446; doi:10.1016/s0140-6736(21)01462-8), 2021-06-28
Supplement: mmc1.pdf [file mmc1.pdf]

# THE LANCET

## **Supplementary appendix**

This appendix formed part of the original submission and has been peer reviewed.  
We post it as supplied by the authors.

Supplement to: Wall EC, Wu M, Harvey R, et al. AZD1222-induced neutralising antibody activity against SARS-CoV-2 Delta VOC. *Lancet* 2021; published online June 28.  
[http://dx.doi.org/10.1016/S0140-6736\(21\)01462-8](http://dx.doi.org/10.1016/S0140-6736(21)01462-8).

# **AZD1222-induced neutralising antibody activity against SARS-CoV-2 Delta VOC**

Emma C Wall\*<sup>1,2</sup>, Mary Wu\*<sup>1</sup>, Ruth Harvey\*<sup>3</sup>, Gavin Kelly<sup>1</sup>, Scott Warchal<sup>1</sup>, Chelsea Sawyer<sup>1</sup>, Rodney Daniels<sup>3</sup>, Lorin Adams<sup>3</sup>, Philip Hobson<sup>1</sup>, Emine Hatipoglu<sup>4</sup>, Yenting Ngai<sup>4</sup>, Saira Hussain<sup>1</sup>, Karen Ambrose<sup>1</sup>, Steve Hindmarsh<sup>1</sup>, Rupert Beale<sup>1,4,6</sup>, Andrew Riddell<sup>1</sup>, Steve Gamblin<sup>1</sup>, Michael Howell<sup>1</sup>, George Kassiotis<sup>1,5</sup>, Vincenzo Libri<sup>2,4</sup> Bryan Williams <sup>2,4</sup>, Charles Swanton<sup>1,4</sup>, Sonia Gandhi\*<sup>1,4</sup>, David LV Bauer\*<sup>1,6</sup>

## **Affiliations**

1. The Francis Crick Institute, 1 Midland Road, London, UK
2. National Institute for Health Research (NIHR) University College London Hospitals (UCLH) Biomedical Research Centre and NIHR UCLH Clinical Research Facility, London, UK
3. Worldwide Influenza Centre, The Francis Crick Institute, 1 Midland Road, London, UK
4. University College London, Gower Street, London
5. Department of Infectious Disease, St Mary's Hospital, Imperial College London, London, UK
6. Genotype-to-Phenotype UK National Virology Consortium (G2P-UK)

\*These authors contributed equally to this work.

Lead Authors: George Kassiotis [George.Kassiotis@crick.ac.uk](mailto:George.Kassiotis@crick.ac.uk), Charles Swanton [charles.swanton@crick.ac.uk](mailto:charles.swanton@crick.ac.uk), Sonia Gandhi [sonia.gandhi@crick.ac.uk](mailto:sonia.gandhi@crick.ac.uk), and David LV Bauer [david.bauer@crick.ac.uk](mailto:david.bauer@crick.ac.uk)

Correspondence to: David LV Bauer [david.bauer@crick.ac.uk](mailto:david.bauer@crick.ac.uk)

## **Contents**

Figures 1-4  
Tables 1-3  
Methods

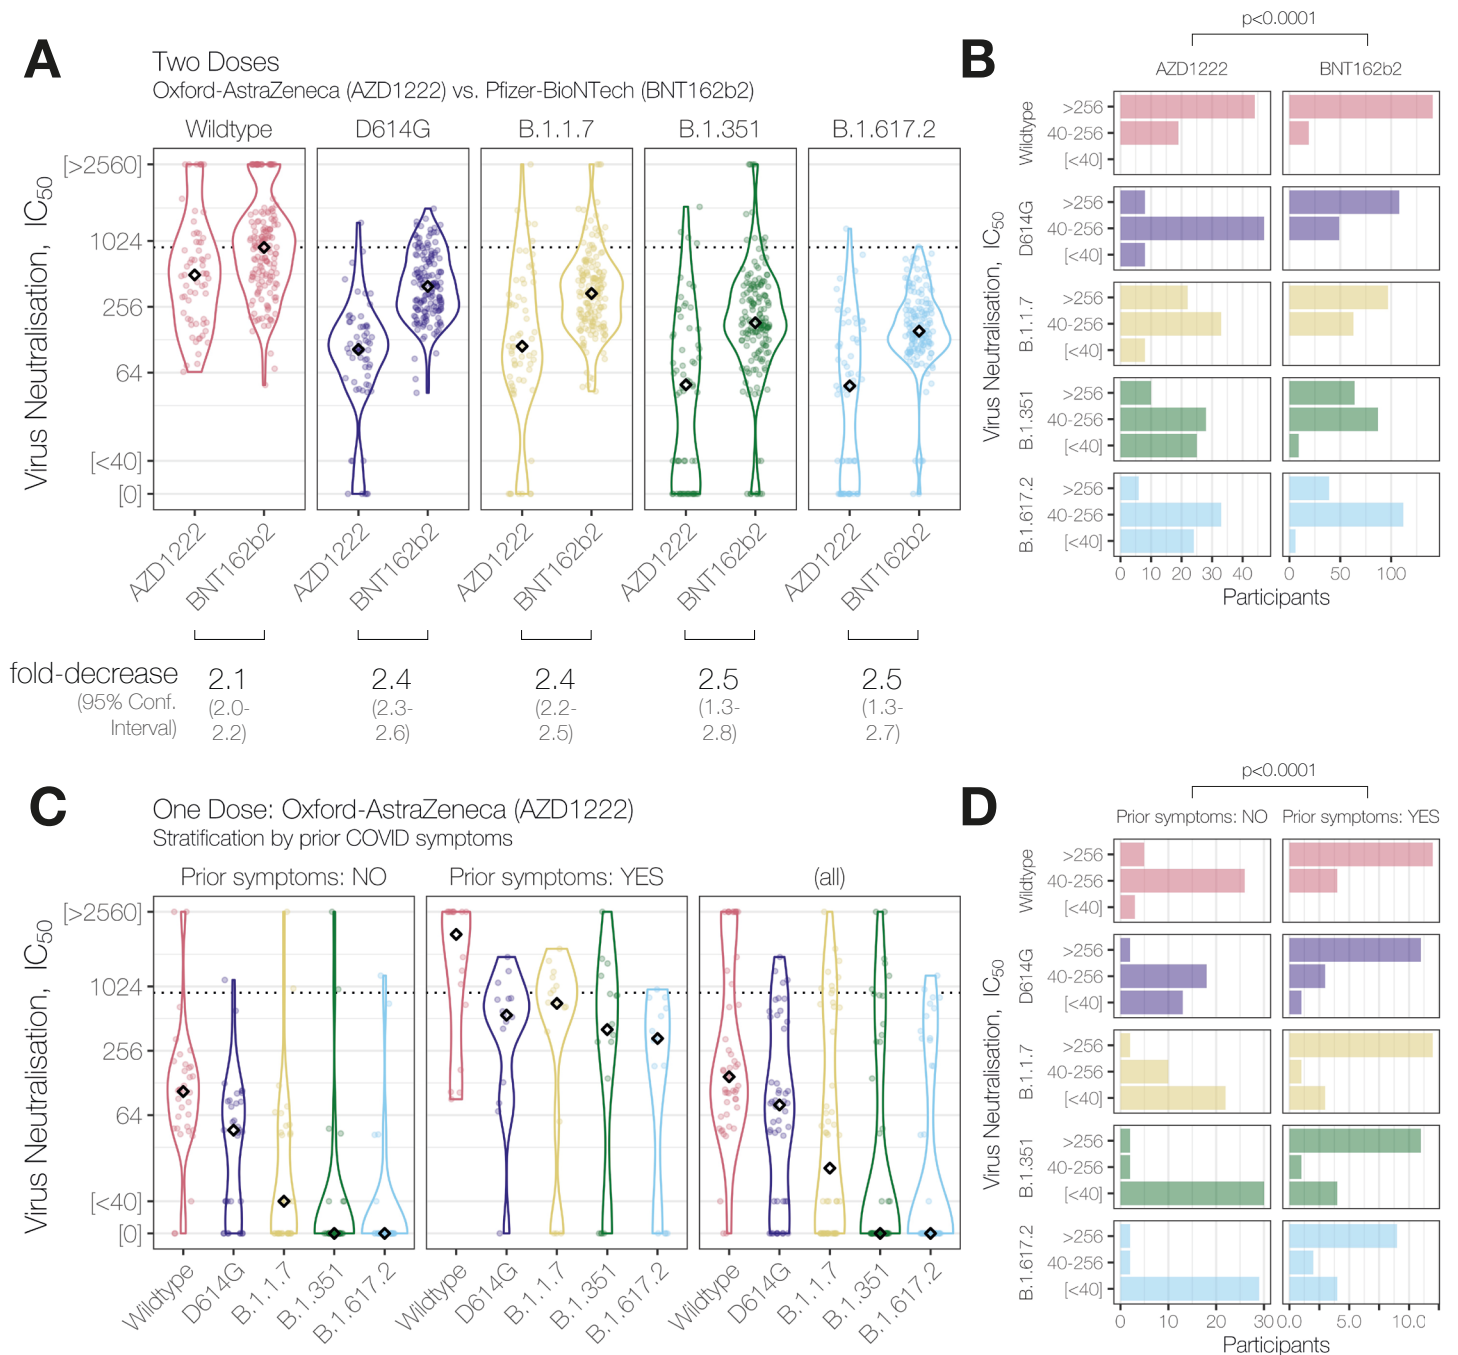

**Figure 1. Neutralising antibody activity against SARS-CoV-2 variants of concern B.1.617.2 and B.1.351 elicited by partial or full vaccination with ChAdOx1 nCoV-19 (AZD1222, Oxford-AstraZeneca) and effect of reported prior COVID symptoms. (A)** Neutralising antibody titres (NAbTs) against five SARS-CoV-2 strains from 63 study participants who had received 2 doses of AZD1222, compared to 159 participants who had received 2 doses of BNT162b2. NAbTs are expressed as serum fold-dilution required to achieve 50% virus neutralisation ( $IC_{50}$ ), and shown **(B)** grouped into 3 response levels. **(C)** NAbTs from 50 participants following 1 dose of AZD1222, stratified according to participants' report of prior COVID symptoms, and **(D)** grouped into 3 response levels.

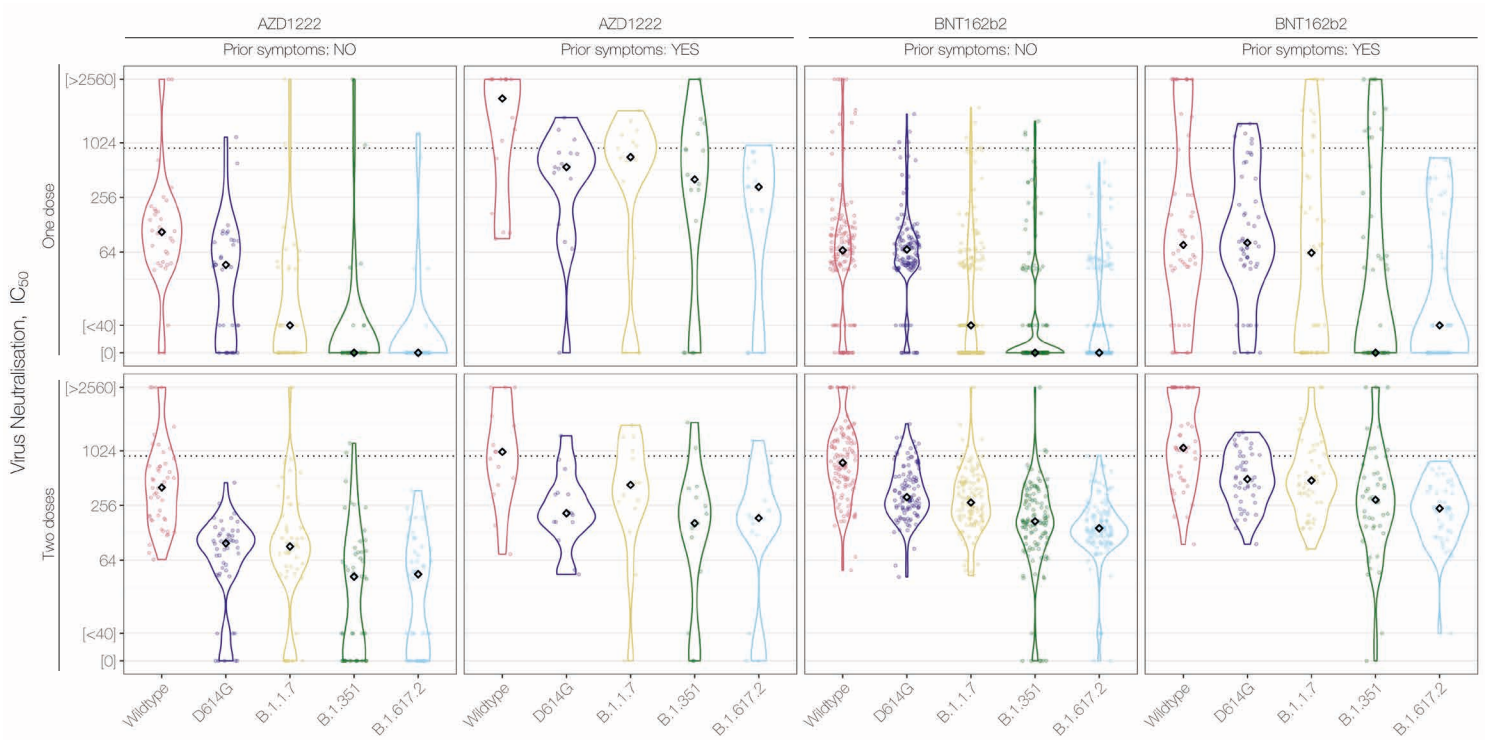

**Figure 2. NAbT responses stratified by Vaccine Type, number of doses, and self-reported prior COVID symptoms.** Data from this study and from (Wall, Wu, et al., Lancet, 2021)<sup>10</sup>.

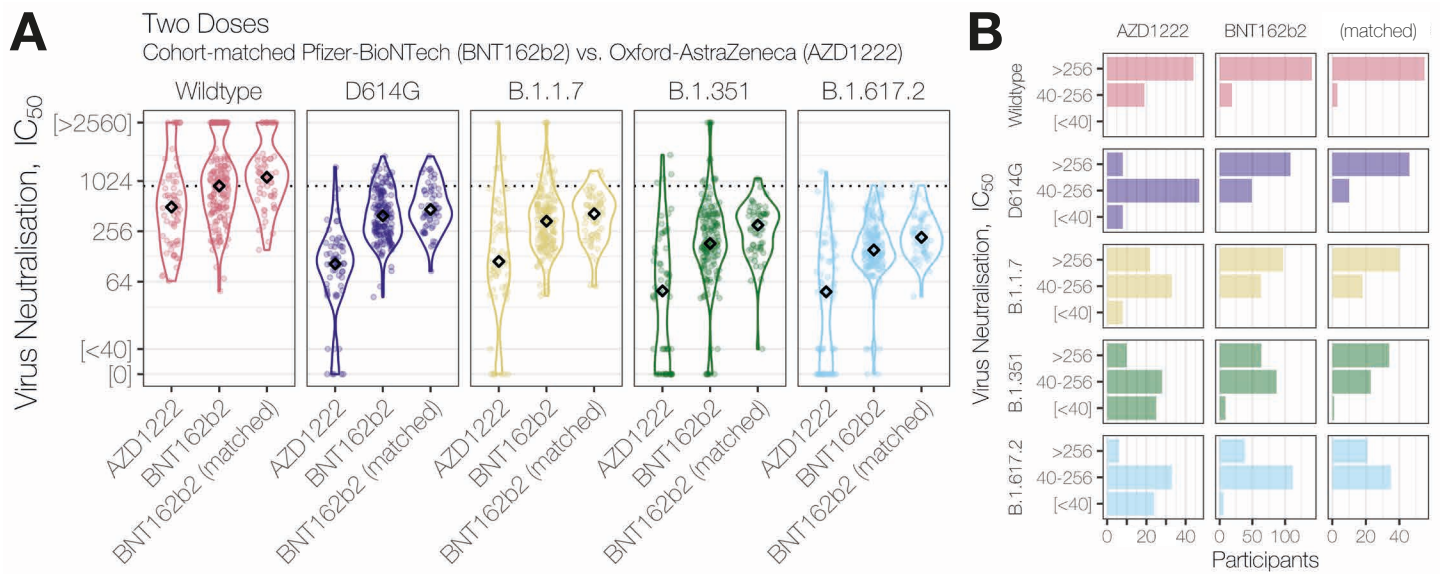

**Figure 3. Neutralising antibody responses of AZD1222 recipients vs. cohort-matched BNT162b2 recipients.** (A) Neutralising antibody titres (NAbTs) against five SARS-CoV-2 strains from study participants who had received 2 doses of AZD1222, compared to participants who had received 2 doses of BNT162b2, and a matched subset of BNT162b2 recipients selected to match characteristics of AZD1222 cohort (single study site, age < 50 years, dose interval > 40 days), see Table 1. NAbTs are expressed as serum fold-dilution required to achieve 50% virus neutralisation ( $IC_{50}$ ), and shown (B) grouped into 3 response levels.

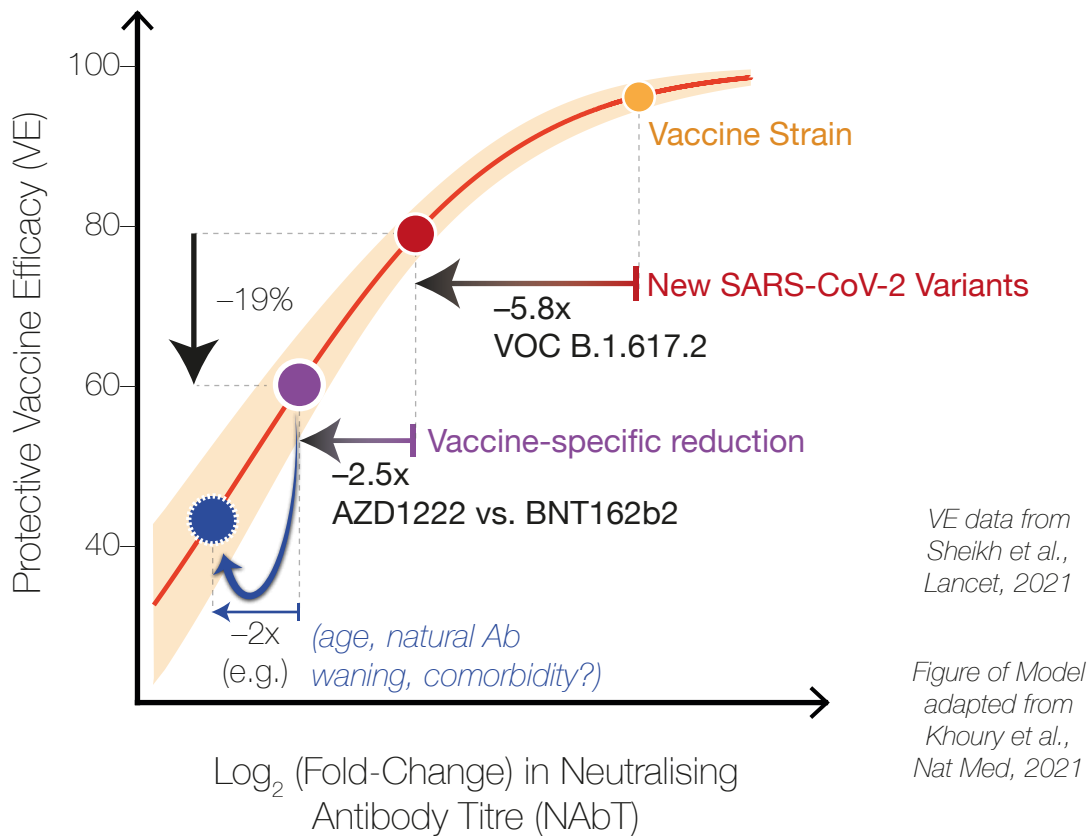

**Figure 4. Schematic illustrating correlates between neutralising antibody titres against SARS-CoV-2 and vaccine efficacy (VE).** Schematic based on the model of Khoury et al., overlaid with our laboratory measurements of neutralising antibody titres (NAbTs) against SARS-CoV-2 and observed real-world VE data from Sheikh et al., illustrating the relationship between NAbTs and VE. When NAbTs begin at a high level (e.g. against variants with spike proteins similar to the Wild-type spike in first-generation vaccines), small changes in NAbTs have a small effect on VE. However, when titres begin from a lower level, such as from a cumulative effect of VOCs and vaccine type, small additional changes in NAbTs (e.g. due to age, antibody waning, immune status) now have a larger effect on VE.

Site = Crick  
 Age < 50 years  
 Dose Interval > 40 days

|                            | AZD1222                     |                   |         | BNT162b2                |                | BNT162b (Wall, Wu et al., Lancet, 2021) |                   |         |
|----------------------------|-----------------------------|-------------------|---------|-------------------------|----------------|-----------------------------------------|-------------------|---------|
|                            | Unique Participants n = 106 |                   | P-Value | (Cohort-Matched Subset) |                | Unique Participants n = 250             |                   | P-Value |
|                            | First Dose                  | Second Dose       |         | Second Dose             | P (vs AZD1222) | First Dose                              | Second Dose       |         |
|                            | Mean/Count (SD/%)           | Mean/Count (SD/%) |         | Mean/Count (SD/%)       |                | Mean/Count (SD/%)                       | Mean/Count (SD/%) |         |
|                            | n = 50                      | n = 63            |         | n = 58                  |                | n = 149                                 | n = 159           |         |
| <b>Site</b>                |                             |                   | 0.87    |                         | 0.34           |                                         |                   | 0.052   |
| Crick                      | 49 (98%)                    | 62 (98.4%)        |         | 58 (100%)               |                | 95 (63.8%)                              | 84 (52.8%)        |         |
| UCLH                       | 1 (2%)                      | 1 (1.6%)          |         | 0 (0%)                  |                | 54 (36.2%)                              | 75 (47.2%)        |         |
| <b>Age</b>                 |                             |                   | 0.23    |                         | 0.74           |                                         |                   | 0.812   |
|                            | 37.3 (8.6)                  | 35.3 (8.7)        |         | 35.8 (7.8)              |                | 42.7 (11.9)                             | 43.1 (11.6)       |         |
| <b>Sex</b>                 |                             |                   | 0.62    |                         | 0.14           |                                         |                   | 0.041   |
| Female                     | 34 (68%)                    | 40 (63.5%)        |         | 44 (75.9%)              |                | 109 (73.2%)                             | 99 (62.3%)        |         |
| Male                       | 16 (32%)                    | 23 (36.5%)        |         | 14 (24.1%)              |                | 40 (26.8%)                              | 60 (37.7%)        |         |
| <b>BMI</b>                 |                             |                   | 0.68    |                         | 0.60           |                                         |                   | 0.870   |
|                            | 23.8 (3.9)                  | 23.5 (3.8)        |         | 23.7 (5.1)              |                | 24.9 (5.4)                              | 24.9 (5.6)        |         |
| <b>Ethnicity (Grouped)</b> |                             |                   | 0.04    |                         | 0.13           |                                         |                   | 0.362   |
| All White Bkgs.            | 42 (84%)                    | 42 (66.7%)        |         | 47 (81%)                |                | 123 (82.6%)                             | 125 (78.6%)       |         |
| All S. Asian Bkgs.         | 0 (0%)                      | 9 (14.3%)         |         | 2 (3.4%)                |                | 5 (3.4%)                                | 11 (6.9%)         |         |
| All Other Bkgs.            | 7 (14%)                     | 11 (17.5%)        |         | 9 (15.5%)               |                | 21 (14.1%)                              | 23 (14.5%)        |         |
| (No response)              | 1 (2%)                      | 1 (1.6%)          |         | 0 (0%)                  |                |                                         |                   |         |

**Table 1.** A second initial analysis of the Legacy study (University College London Hospital and the Francis Crick Institute)

Ordered Logistic Regression      IC50\_binned ~ Strain \* VaccineType

| <b>Factor</b>                               | <b>Coef.</b> | <b>S.E.</b> | <b>Wald Z</b> | <b>Pr(&gt; Z )</b> |
|---------------------------------------------|--------------|-------------|---------------|--------------------|
| <b>Strain (vs. Wildtype)</b>                |              |             |               |                    |
| D614G                                       | -2.5880      | 0.3894      | -6.65         | <0.0001            |
| B.1.1.7                                     | -1.6845      | 0.3816      | -4.41         | <0.0001            |
| B.1.351                                     | -3.5941      | 0.4058      | -8.86         | <0.0001            |
| B.1.617.2                                   | -3.7118      | 0.4000      | -9.28         | <0.0001            |
| <b>Vaccine Type (vs. AZD1222)</b>           |              |             |               |                    |
| BNT162b2                                    | 1.1504       | 0.3663      | 3.14          | 0.0017             |
| <b>Interactions (Strain * Vaccine Type)</b> |              |             |               |                    |
| D614G * BNT162b2                            | 1.3893       | 0.4902      | 2.83          | 0.0046             |
| B.1.1.7 * BNT162b2                          | 0.1391       | 0.4802      | 0.29          | 0.7721             |
| B.1.351 * BNT162b2                          | 1.1529       | 0.4951      | 2.33          | 0.0199             |
| B.1.617.2 * BNT162b2                        | 0.7467       | 0.4872      | 1.53          | 0.1254             |

↓ ANOVA

Wald Statistics      Response: IC50\_binned

| <b>Factor</b>                                    | <b>Chi-Square</b> | <b>d.f.</b> | <b>P</b> |
|--------------------------------------------------|-------------------|-------------|----------|
| <b>Strain (incl. Higher Order Factors)</b>       | 230.21            | 8           | <.0001   |
| <b>Vaccine Type (incl. Higher Order Factors)</b> | 144.86            | 5           | <.0001   |
| <b>Interaction</b>                               | 13.00             | 4           | 0.0113   |

**Table 2.** Ordered logistic regression model and ANOVA of effect of strain and vaccine type on neutralising antibody response following 2-dose vaccination (Relates to Figure 1B).



Ordered Logistic Regression      IC50\_binned ~ Strain \* PriorCOVIDsymptoms

| <b>Factor</b>                                   | <b>Coef.</b> | <b>S.E.</b> | <b>Wald Z</b> | <b>Pr(&gt; Z )</b> |
|-------------------------------------------------|--------------|-------------|---------------|--------------------|
| <b>Strain (vs. Wildtype)</b>                    |              |             |               |                    |
| D614G                                           | -0.9181      | 0.4349      | -2.11         | 0.0347             |
| B.1.1.7                                         | -1.7536      | 0.4695      | -3.74         | 0.0002             |
| B.1.351                                         | -3.1014      | 0.6196      | -5.01         | <0.0001            |
| B.1.617.2                                       | -3.0659      | 0.6206      | -4.94         | <0.0001            |
| <b>Prior COVID Symptoms (vs. those without)</b> |              |             |               |                    |
| With COVID Symptoms                             | 2.0380       | 0.6474      | 3.15          | 0.0016             |
| <b>Interactions (Strain * Symptoms)</b>         |              |             |               |                    |
| D614G * Symptoms                                | 0.7486       | 0.9235      | 0.81          | 0.4175             |
| B.1.1.7 * Symptoms                              | 1.4876       | 0.9444      | 1.58          | 0.1152             |
| B.1.351 * Symptoms                              | 2.4180       | 1.0096      | 2.39          | 0.0166             |
| B.1.617.2 * Symptoms                            | 1.9735       | 1.0019      | 1.97          | 0.0489             |

↓ ANOVA

Wald Statistics      Response: IC50\_binned

| <b>Factor</b>                                     | <b>Chi-Square</b> | <b>d.f.</b> | <b>P</b> |
|---------------------------------------------------|-------------------|-------------|----------|
| <b>Strain (incl. Higher Order Factors)</b>        | 44.35             | 8           | <.0001   |
| <b>COVID Symptoms (incl. Higher Ord. Factors)</b> | 89.98             | 5           | <.0001   |
| <b>Interaction</b>                                | 7.55              | 4           | 0.1096   |

**Table 3.** Ordered logistic regression model and ANOVA of effect of strain and self-reported prior COVID symptoms on neutralising antibody response following 1-dose AZD1222 vaccination (Relates to Figure 1D).

## Methods

### ***Clinical cohort***

Two prospective cohorts of Legacy participants were established in January 2021 (NCT04750356). Participants were included if they were an employee of either UCLH or the Francis Crick Institute and had submitted at least one sample for RT-qPCR occupational health testing for COVID-19 using the Crick testing pipeline. Participants consisted of patient-facing healthcare workers at UCLH, who had received at least one dose of a currently licensed COVID-19 vaccine and Crick staff. Participants were sampled at approximately 3 weeks post-vaccination and invited for follow-up visits at approximately 6 and 12 weeks. All participants were sampled at each visit with additional nasopharyngeal RT-qPCR for SARS CoV-2 (in addition to their occupational health testing) to exclude concurrent active infection, blood was collected for serological assays. Participants were analysed by vaccine type, vaccine dose number, date since vaccine dose, and self-reported prior COVID-19 symptoms.

### ***Serological Analysis and Live-virus Neutralisation***

All serological analysis, including live-virus neutralisation assay, were performed exactly as previously described (**Wall, Wu et al., *Lancet*, 2021**)<sup>10</sup>

### ***Data analysis, statistics***

Study data were collected and managed using REDCap electronic data capture tools hosted at University College London<sup>8,9</sup>. Data were exported from REDCap into R for visualisation and analysis. IC<sub>50</sub> values above the quantitative limit of detection of the assay (>2560) were recoded as 5120; IC<sub>50</sub> values below the quantitative limit of the assay (< 40) but within the qualitative range were recoded as 10 and data below the qualitative range (i.e. no response observed) were recoded as 5. These changes do not affect any statistical parameters considered in the analysis and we do not perform analyses that consider that consider the absolute value of the points – i.e. rank-based analyses are used instead: statistical significance of the difference in median viral neutralisation IC<sub>50</sub> values between different strains was performed using a paired Wilcoxon Ranked sum test. *p*-values reported have not been corrected for multiple testing. Fold-changes in median NAbTs (and 95% confidence intervals) between BNT162b2 and AZD1222 cohorts were determined using bootstrap statistics using the ‘*boot*’ package in R, specifying vaccine type using the *strata* option. All graphs were generated using the ‘*ggplot2*’ package. Analyses of stratified NAb responses by strain, vaccine type, and COVID symptoms of participants, were carried out using the *prop.test* function of the ‘*stats*’ package in R, and ordered logistic regression using the *lrm* function of

the Regression Modeling Strategies (*rms*) package in R, using the formula  $IC50 \sim Strain * VaccineType$  or  $IC50 \sim Strain * COVIDsymptoms$ , and *p*-values were calculated using the Wald Chi-Square test. Analysis of variance was carried out using the *anova* function in R.

### **Data Sharing**

All data (anonymised) and full R code to produce all figures and statistical analysis presented in this manuscript are freely-available online on Github: <https://github.com/davidlvb/Crick-UCLH-Legacy-AZ-VOCs-2021-06>

### **Ethics**

The Legacy study was approved by London Camden and Kings Cross Health Research Authority (HRA) Research and Ethics committee (REC) IRAS number 286469 and sponsored by University College London.

### **Role of the funding source**

This work was undertaken at UCLH/UCL who received a proportion of funding from the National Institute for Health Research (NIHR) University College London Hospitals Department of Health's NIHR Biomedical Research Centre (BRC). EW, VL and BW are supported by the Centre's funding scheme. This work was supported jointly by the BRC and core funding from the Francis Crick Institute, which receives its funding from Cancer Research UK, the UK Medical Research Council, and the Wellcome Trust. DLVB is additionally supported by the Genotype-to-Phenotype National Virology Consortium (G2P-UK) via UK Research and Innovation and the UK Medical Research Council. The funders of the study had no role in study design, data collection, data analysis, data interpretation, or writing of the report. The corresponding authors had full access to all the data and the final responsibility to submit for publication.

### **Contributors Statement**

Emma C Wall - Investigation, Data Curation, Writing - original draft. Has access to & has verified underlying data.

Mary Wu - Investigation, Methodology, Resources, Writing – review & editing, Conceptualization

Ruth Harvey - Investigation, Methodology, Resources, Writing – review & editing, Conceptualization

Gavin Kelly - Formal Analysis, Validation

Scott Warchal - Software, Methodology, Formal Analysis

Chelsea Sawyer - Software, Methodology, Formal Analysis

Rodney Daniels - Investigation

Lorin Adams - Investigation

Philip Hobson - Investigation

Emine Hatipoglu - Project administration, Conceptualization

Yenting Ngai - Project administration, Conceptualization

Saira Hussain - Investigation, Resources

Karen Ambrose - Supervision, Software, Methodology

Steve Hindmarsh - Supervision, Software, Methodology  
Rupert Beale - Writing – review & editing, Conceptualization  
Andy Riddell - Supervision, Methodology  
Steve Gamblin - Project administration, Conceptualization  
Michael Howell - Project administration, Supervision, Writing – review & editing, Conceptualization  
George Kassiotis - Writing – review & editing, Conceptualization  
Vincenzo Libri - Funding acquisition, Project administration  
Bryan Williams - Funding acquisition, Project administration, Writing – review & editing, Conceptualization  
Charles Swanton - Supervision, Funding acquisition, Project administration, Writing – review & editing, Conceptualization. Has access to & has verified underlying data.  
Sonia Gandhi - Supervision, Funding acquisition, Methodology, Project administration, Writing – review & editing, Conceptualization. Has access to & has verified underlying data.  
David LV Bauer - Methodology, Formal Analysis, Visualization, Writing - original draft, Conceptualization. Has access to & has verified underlying data.

## **Acknowledgements**

This research was funded in whole, or in part, by the Wellcome Trust [FC011104, FC011233, FC001030, FC001159, FC001827, FC001078, FC001099, FC001169]. For the purpose of Open Access, the author has applied a CC BY public copyright licence to any Author Accepted Manuscript version arising from this submission. The authors would like to thank all the study participants, the staff of the NIHR Clinical Research Facility at UCLH including Kirsty Adams and Marivic Ricamara. We would like to thank Jules Marczak, Gita Mistry, Simon Caiden, Bobbi Clayton, and the staff of the Scientific Technology Platforms (STPs) and COVID-19 testing pipeline at the Francis Crick Institute. We thank Prof. Wendy Barclay of Imperial College and the wider Genotype to Phenotype consortium for the B.1.1.7 and B.1.617.2 strains used in this study, and Max Whiteley and Thushan I de Silva at The University of Sheffield and Sheffield Teaching Hospitals NHS Foundation Trust for providing source material. We thank Prof. Alex Sigal and Prof. Tulio de Oliveira for the B.1.351 virus strain used in this study, as well as Dr Laura McCoy of UCL for her original synthesis of the CR3009 protein used in the HTS assay. We also thank Marg Crawford, Robert Goldstone, Jerome Nicod, and Harshil Patel for generation and processing of sequencing data. This work was supported by the National Institute for Health Research University College London Hospitals Department of Health's NIHR Biomedical Research Centre (BRC), as well as by the UK Research and Innovation and the UK Medical Research Council (MR/W005611/1), and by the Francis Crick Institute which receives its core funding from Cancer Research UK (FC011104, FC011233, FC001030, FC001159, FC001827, FC001078, FC001099, FC001169), the UK Medical Research Council (FC011104, FC011233, FC001030, FC001159, FC001827, FC001078, FC001099, FC001169), and the Wellcome Trust (FC011104, FC011233, FC001030, FC001159, FC001827, FC001078, FC001099, FC001169).

## Supplementary References

1. Ng KW, Faulkner N, Cornish GH, et al. Preexisting and de novo humoral immunity to SARS-CoV-2 in humans. *Science* 2020; **370**(6522): 1339-43.
2. Houlihan CF, Vora N, Byrne T, et al. Pandemic peak SARS-CoV-2 infection and seroconversion rates in London frontline health-care workers. *Lancet* 2020; **396**(10246): e6-e7.
3. Brown JC, Goldhill DH, Zhou J, et al. Increased transmission of SARS-CoV-2 lineage B.1.1.7 (VOC 2020212/01) is not accounted for by a replicative advantage in primary airway cells or antibody escape. *bioRxiv* 2021: 2021.02.24.432576.
4. Cele S, Gazy I, Jackson L, et al. Escape of SARS-CoV-2 501Y.V2 from neutralization by convalescent plasma. *Nature* 2021; **593**(7857): 142-6.
5. Faulkner N, Ng KW, Wu M, et al. Reduced antibody cross-reactivity following infection with B.1.1.7 than with parental SARS-CoV-2 strains. *bioRxiv* 2021: 2021.03.01.433314.
6. Rihn SJ, Merits A, Bakshi S, et al. A plasmid DNA-launched SARS-CoV-2 reverse genetics system and coronavirus toolkit for COVID-19 research. *PLoS Biol* 2021; **19**(2): e3001091.
7. van den Brink EN, Ter Meulen J, Cox F, et al. Molecular and biological characterization of human monoclonal antibodies binding to the spike and nucleocapsid proteins of severe acute respiratory syndrome coronavirus. *J Virol* 2005; **79**(3): 1635-44.
8. Harris PA, Taylor R, Minor BL, et al. The REDCap consortium: Building an international community of software platform partners. *J Biomed Inform* 2019; **95**: 103208.
9. Harris PA, Taylor R, Thielke R, Payne J, Gonzalez N, Conde JG. Research electronic data capture (REDCap)--a metadata-driven methodology and workflow process for providing translational research informatics support. *J Biomed Inform* 2009; **42**(2): 377-81.
10. Wall EC, Wu M, Harvey R, et al. Neutralising antibody activity against SARS-CoV-2 VOCs B.1.617.2 and B.1.351 by BNT162b2 vaccination. *Lancet* 2021; published online June 3. DOI:10.1016/S0140-6736(21)01290-3.
